# Supplementary material for: A series of new hybrid selenidostannates with metal complexes prepared in alkylol amines
Source: Royal Society of Chemistry journal article supplement (doi:10.1039/c8dt03322f), 2018-01-01
Supplement: c8dt03322f1.pdf [file c8dt03322f1.pdf]

## A series of new hybrid selenidostannates with metal complexes prepared in alkylol amine

Hai-Ying Luo, and Jian Zhou

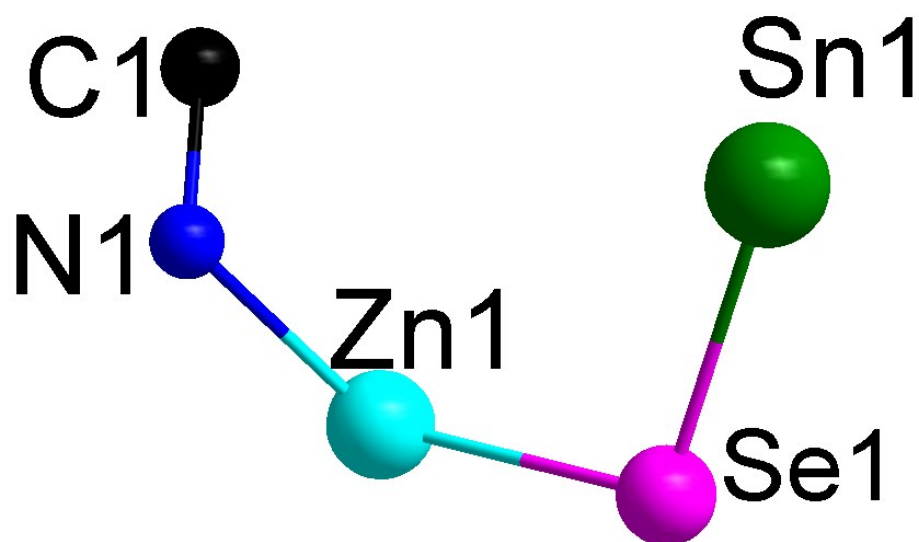

Fig. S1 The asymmetric unit of **5**. All H bonded to C/N atoms are omitted for clarity.

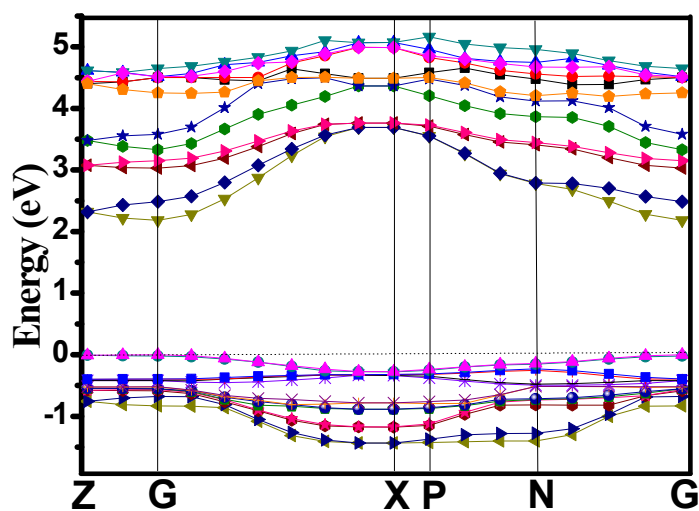

Fig. S2 The calculated band structure of **5**. The Fermi level is set at 0 eV.

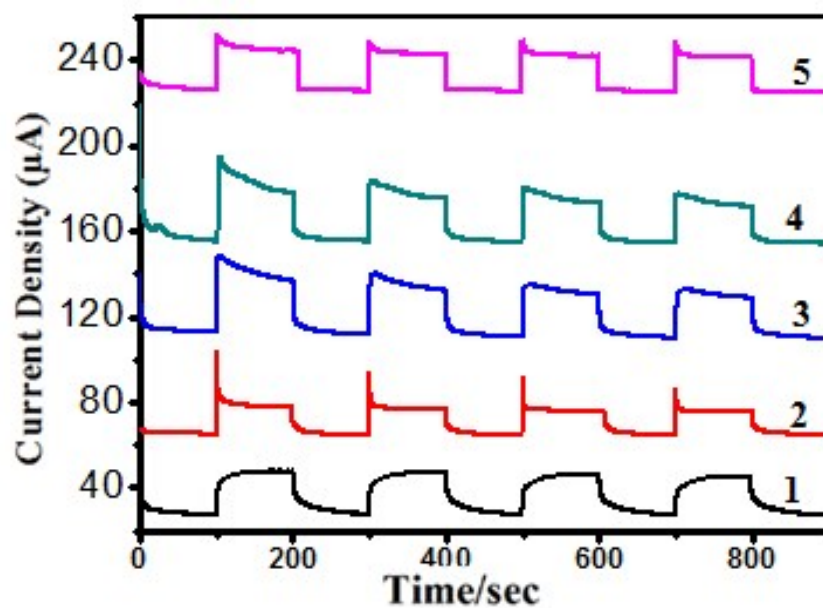

Fig. S3 Photocurrent density versus time of 1-5 at 0.6 V potential.

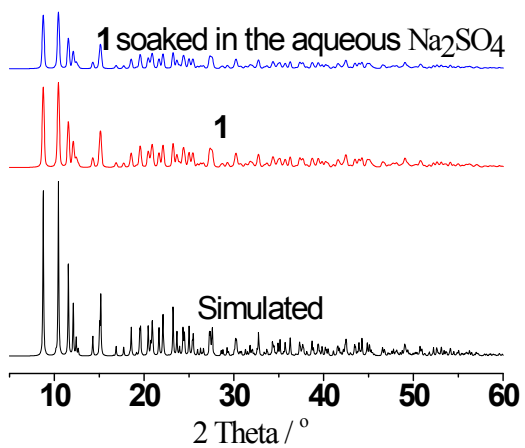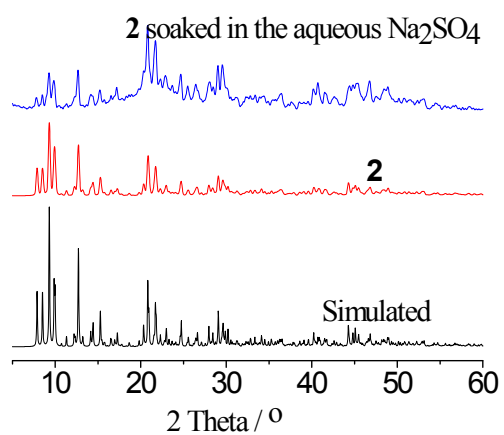

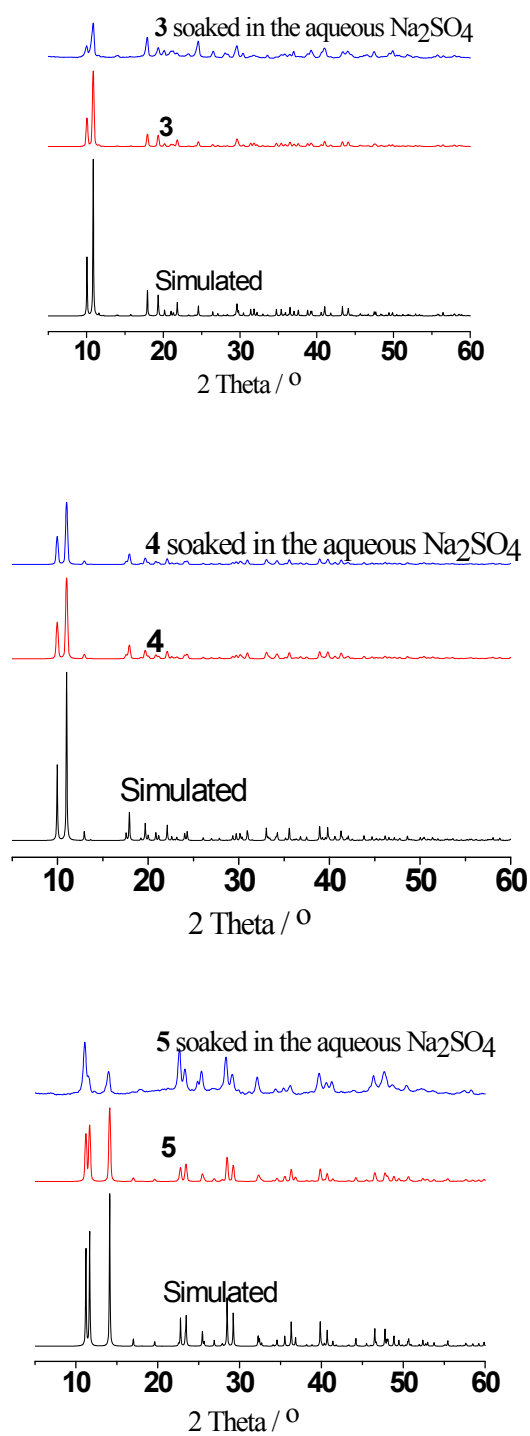

Fig. S4 Simulated, experimental powder XRD patterns of 1-5.
